# Supplementary material
Source: Springer Nature journal article supplement (https://www.springermedizin.de/resource/supplementary/12885_2009_1891_MOESM2_ESM.pdf/9461502)

**A****COX2****MMP1****MMP2****FaDu**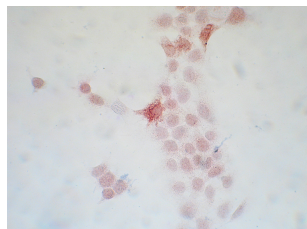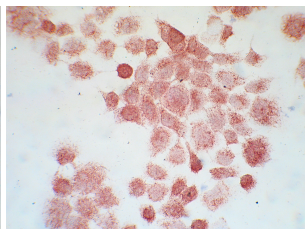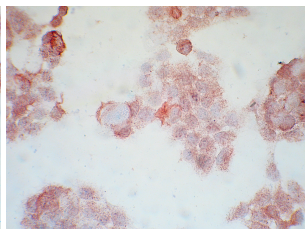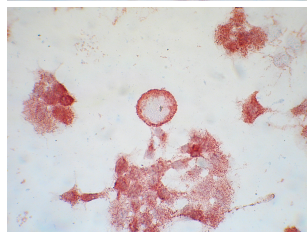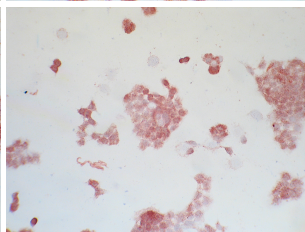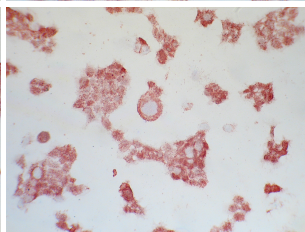**MMP3****MMP9****VEGF****B****COX2****MMP1****MMP2****HeLa**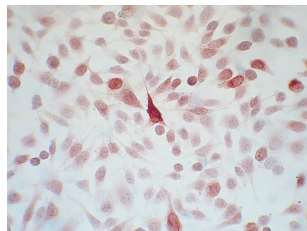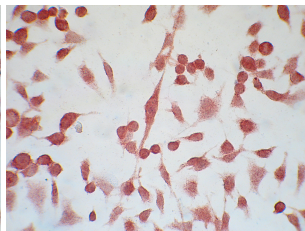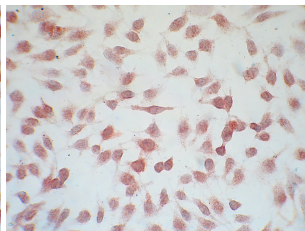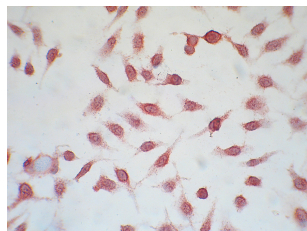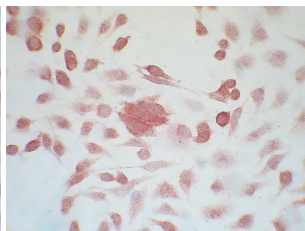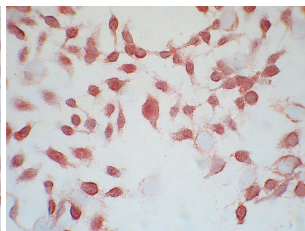**MMP3****MMP9****VEGF**

Supplement: MOESM2 [file 9461502]
